# Supplementary material
Source: publisher figshare collection journal article supplement (https://asha.figshare.com/articles/dataset/_/19449839)
Supplement: Supplementary file 1 [file 1]

**Supplemental Material S1.** Additional diagnoses ( $n = 39$ ): number of participants in our sample diagnosed with other conditions.

| Condition              | Specific condition            | <i>n</i> |
|------------------------|-------------------------------|----------|
| Premature              |                               | 17       |
|                        | Extremely premature           | 11       |
|                        | NICU stay                     | 16       |
| Health issues          |                               | 36       |
|                        | Heart                         | 9        |
|                        | Lung                          | 5        |
|                        | Illness                       | 15       |
|                        | Feeding issues                | 14       |
|                        | Pregnancy/birth complications | 11       |
|                        | Musculoskeletal               | 9        |
|                        | Cleft lip/palate              | 4        |
|                        | Other                         | 15       |
| Developmental concerns |                               | 17       |
|                        | Down syndrome                 | 5        |
|                        | Chromosomal issues            | 2        |
|                        | Neural tube defects           | 2        |
|                        | Other                         | 10       |
| Vision loss            |                               | 5        |
|                        | Retinopathy of prematurity    | 1        |
|                        | Nearsightedness               | 1        |
|                        | Farsightedness                | 1        |
|                        | Cortical visual impairment    | 1        |

*Note.* *ns* do not sum to total because many participants had multiple diagnoses.
