# Supplementary material
Source: publisher figshare collection journal article supplement (https://asha.figshare.com/articles/dataset/_/19449839)
Supplement: Supplementary file 2 [file 1]

**Supplemental Material S3.** Language and communication characteristics of the sample: number of participants by language background and communication method.

| <b>Communication</b> | <b>English</b> | <b>Hindi</b> | <b>Spanish</b> | <b>Total</b> |
|----------------------|----------------|--------------|----------------|--------------|
| Cued speech          | 1              | 0            | 0              | 1            |
| Spoken               | 67             | 1            | 11             | 79           |
| Total communication  | 15             | 0            | 3              | 18           |
