# Supplementary material
Source: publisher figshare collection journal article supplement (https://asha.figshare.com/articles/dataset/_/19449839)
Supplement: Supplementary file 3 [file 1]

**Supplemental Material S2.** Audiological characteristics of the sample.

| <b>Laterality</b> | <b>Amplification</b> | <b>Degree<br/>(better ear;<br/>dB HL)</b> | <b>Degree<br/>(worse ear;<br/>dB HL)</b> | <b>Age of<br/>amplification<br/>(months)</b> | <b>Age of<br/>implantation<br/>(months)</b> |
|-------------------|----------------------|-------------------------------------------|------------------------------------------|----------------------------------------------|---------------------------------------------|
| Bilateral         | CI                   | 85.60                                     | 89.79                                    | 11.29                                        | 14.12                                       |
| Bilateral         | HA                   | 47.51                                     | 56.28                                    | 8.18                                         |                                             |
| Bilateral         | none                 | 49.67                                     | 53.65                                    |                                              |                                             |
| Unilateral        | HA                   | 4.70                                      | 54.09                                    | 9.91                                         |                                             |
| Unilateral        | none                 | 2.50                                      | 71.55                                    | 8.50                                         |                                             |

*Note.* First two columns describe laterality and amplification type: cochlear implant (CI), hearing aid (HA), or none. Mean decibels of hearing loss (HL) in better ear, worse ear, and the mean age (in months) of amplification, and cochlear implantation (when applicable) for each laterality and amplification combination.
