# Supplementary material
Source: publisher figshare collection journal article supplement (https://asha.figshare.com/articles/dataset/_/19449839)
Supplement: Supplementary file 4 [file 1]

**Supplemental Material S5.** Unstandardized beta weights (months) for the model of age at diagnosis selected by AIC.

| <b>Term</b>                   | <b>Estimate</b> | <b>Std Error</b> | <b>Statistic</b> | <b><i>p</i> value</b> |
|-------------------------------|-----------------|------------------|------------------|-----------------------|
| (Intercept)                   | 9.08            | 1.94             | 4.68             | < .001                |
| Health issues (yes)           | 3.65            | 1.44             | 2.53             | .013                  |
| Language background (English) | −6.18           | 1.93             | −3.20            | .002                  |
| Laterality (Unilateral)       | −2.21           | 1.60             | −1.38            | .170                  |
