# Supplementary material
Source: publisher figshare collection journal article supplement (https://asha.figshare.com/articles/dataset/_/19449839)
Supplement: Supplementary file 5 [file 1]

**Supplemental Material S4.** Unstandardized beta weights (months of vocabulary delay) for the model of vocabulary delay selected by AIC.

| Term                             | Estimate | Std error | Statistic | <i>p</i> value |
|----------------------------------|----------|-----------|-----------|----------------|
| (Intercept)                      | −0.51    | 1.74      | −0.29     | .770           |
| Laterality (unilateral)          | −3.03    | 1.14      | −2.66     | .009           |
| Amplification (cochlear implant) | −3.58    | 1.49      | −2.40     | .019           |
| Amplification (hearing aid)      | −3.89    | 1.14      | −3.41     | .001           |
| Age (months)                     | 0.55     | 0.06      | 9.64      | < .001         |
