# Supplementary material
Source: publisher figshare collection journal article supplement (https://asha.figshare.com/articles/dataset/_/19449839)
Supplement: Supplementary file 6 [file 1]

**Supplemental Material S6.** Unstandardized beta weights (months) for the model of age at diagnosis intervention by AIC.

| <b>Term</b>                   | <b>Estimate</b> | <b>Std error</b> | <b>Statistic</b> | <b><i>p</i> value</b> |
|-------------------------------|-----------------|------------------|------------------|-----------------------|
| (Intercept)                   | 14.63           | 2.76             | 5.29             | < .001                |
| Degree of hearing loss        | −0.09           | 0.03             | −3.02            | .003                  |
| Premature (yes)               | 3.79            | 1.96             | 1.93             | .057                  |
| Age at diagnosis              | 0.65            | 0.10             | 6.25             | < .001                |
| Language background (English) | −1.37           | 2.05             | −0.67            | .506                  |
